# Supplementary material
Source: publisher site journal article supplement (https://www.dovepress.com/article/460499)
Supplement: Supplementary file 1 [file get_supplementary_file.php]

**Supplementary Material File S1 The three domains of the IODM**

First domain: *Medical Technical Information.*

In addition to the patient related information, evidence-based medicine (EBM) and clinical practice guidelines are important building blocks for formulating treatment options in MDTs. Geerts et al. 41 found, by interviewing professionals who attended the MDT weekly, there was a need of selecting patients who need more elaborate decision-making as and when possible, to discuss treatment alternatives or recognize that alternatives are available and provide these in the MDT report instead of formulating one single recommendation. It shows the increasingly recognition that clinical practice guidelines can facilitate SDM by presenting alternative treatment options. Tools and strategies are needed to make this procedure less complex. Lamb et al. investigates the MDT and its structure and facilitators and barriers and mentioned that a decision made by a tumour board is associated with the quality of teamwork, and that it can be improved using a multicomponent intervention based on the team training and checklist 43-45.

Second domain: *General Health Status*

Positive Health defined as ‘the ability to adapt and self-manage in the face of social, physical and emotional challenges’ is introduced as a new concept of Health in 2011 by Huber et all. 46. To assess the general health status of patients a wealth of validated instruments is available 47-49. Both generic instruments, such as the SF-36 and the EQ-5D, and disease-specific instruments are available. Such instruments assess individual’s health status and therefore are important as health care providers are challenged to justify their treatment approach and rationale. The health status of a patient is an important variable, which can be the reason that a treatment recommendation shifts from having surgery to only medication 50. Most of the research on general health status is done in older patients by for example the Comprehensive Geriatric Assessment.

Third domain: *Patient Preferences and Goals*

To create an individualized treatment plan with SDM, information is needed regarding patient preferences and goals. Patient preferences are determined by the context of the patient (e.g., work situation, living situation, and hobbies), by the patient’s underlying goals, and how the patient values the pros and cons of the treatment options. Already early in the patient journey the patient’s global values, situational values, and external values can be explored 51. Global values can include value traits and life priorities, such as the wish to life as long as possible or the desire to have children. Situational values are values tied to a specific moment in time that modify patients' existing values or the timing of a treatment, e.g., change in jobs, or expecting a grandchild. External values acknowledge that many patients consider values other than their own when making decisions. Later in the patient journey, when clarity can be given on what treatment option(s) is available for the patient, we need to learn how the patient values the balance between the pros and cons of the treatment option(s). There are strategies and tools available for either supporting this process as help explore patients’ overarching preferences, goals and values. For instance, generic value-eliciting tools such as the Outcome Prioritization Tool, or decision-specific patient decision aids facilitate discussion of goals and preferences with patients. Categories of decision aids can be face-to-face in clinical encounters such as the ‘issues cards’ or can be used independently of a clinical encounter (either before or after the consultation for better involvement in the decision-making) 52,53. Discussions containing the patient’s preferences and goals can help patients verbalize their values in a dialogue with their healthcare provider. Besides, when such value eliciting tools are discussed with the healthcare provider, it helps the patient understand that active participation is warranted in the decision-making process. In this way, patients can open up about their context, goals, and values, but also clarify their preferences, of the treatment options discussed trading of potential benefits relative to harms, including treatment burden 54,55.

**Supplementary Material File S2**

**The search strategies for PubMed, Embase and Web of Science**

**PubMed**

#1 "Medical Oncology"[Mesh] OR "Neoplasms"[MeSH] OR Neoplasm*[tiab] OR Tumor*[tiab] OR Tumour*[tiab] OR Cancer*[tiab] OR malignan*[tiab] OR oncolog*[tiab] OR carcinom*[tiab] OR lymphoma*[tiab]

**#2** "Interdisciplinary Communication"[MeSH] OR "Delivery of Health Care, Integrated"[Mesh] OR "Oncology Service, Hospital"[MeSH] OR "Patient Care Team"[MeSH] OR "Interdisciplinary Communication"[tiab] OR "Patient Care Team*"[tiab] OR multidisciplinar*[tiab] OR multi-disciplinar*[tiab] OR "tumor board*"[tiab] OR "tumour board*"[tiab]

**#3** "Patient Care Planning"[Mesh] OR "Patient Centered Care"[MeSH] OR "Goals"[MeSH] OR "Patient Preference"[Mesh] OR "Professional-Patient Relations"[Mesh] OR "Patient Preference*"[tiab] OR "Professional-Patient Relation*"[tiab] OR "Physician-Patient Relation*"[tiab] OR "patient goal*"[tiab] OR precision[tiab] OR individual*[tiab] or personaliz*[tiab] OR personalis*[tiab] OR "patient centered*"[tiab] OR "patient reported"[tiab] OR "patient centred"[tiab] OR "patient orientated"[tiab] OR "patient oriented"[tiab] OR "patient tailored"[tiab] OR "patient focused"[tiab] OR "person centered*"[tiab] OR "person centred"[tiab] OR "person orientated"[tiab] OR "person oriented"[tiab] OR "person tailored"[tiab] OR "person focused"[tiab]

**#4** "Decision Support Techniques"[MeSH] OR "Decision Making"[MeSH] OR "Patient Participation"[MeSH] OR "shared decision making"[tiab] OR "Decision Support Technique*"[tiab] OR "Decision Support Model*"[tiab] OR "Patient Participation*"[tiab] OR "decision support"[tiab] OR "decision-making"[tiab] OR "collaborative decision*"[tiab] OR "shared decision*"[tiab] OR "informed decision*"[tiab] OR "informed choice*"[tiab] OR "collaborative decision*"[tiab] OR ((share*[tiab] OR sharing[tiab] OR informed[tiab]) AND (decision*[tiab] OR deciding[tiab] OR choice*[tiab]))

**#5** "Health Status"[Mesh] OR "Geriatric Assessment"[Mesh] OR "patient reported outcome measures"[MeSH] OR "Health Status"[tiab] OR "geriatric assessment*"[tiab] OR "patient reported outcom*"[tiab] OR "health tool"[tiab:~2] OR "health tools"[tiab:~2]

**#6** "Guidelines as Topic"[Mesh] OR "Clinical Decision Making"[MESH] OR "Evidence-based Medicine"[MeSH] OR guideline*[tiab] OR "clinical decision making"[tiab] OR "evidence based medicine"[tiab]

**#7** #1 AND #2 AND #3 AND #4 AND #5
**#8** #1 AND #2 AND #3 AND #4 AND #6

**#9** #3 OR #4

**#10** #1 AND #2 AND #9 AND #5 AND #6

**#11** #7 OR #8 OR #9

**Embase**

**#1** Oncology/ or Neoplasms/ or (Neoplasm* or Tumor* or Tumour* or Cancer* or malignan* or oncolog* or carcinom* or lymphoma*).ti,ab,kw.

**#2** Interdisciplinary Communication/ or integrated health care system/ or Cancer center/ or Patient care team/ or ("Interdisciplinary Communication" or “Patient Care Team*" or multidisciplinar* or multi-disciplinar* or "tumor board*" or "tumour board*").ti,ab,kw.

**#3** patient care planning/ or patient care/ or motivation/ or extrinsic motivation/ or intrinsic motivation/ or motivational intensity/ or Patient Preference/ or Professional-patient relationship/ or ("Patient Preference*" or "Professional-Patient Relation*" or "Physician-Patient Relation*" or "patient goal*" or precision or individual* or personaliz* or personalis* or "patient centered*" or "patient centred" or "patient reported" or "patient orientated" or "patient oriented" or "patient tailored" or "patient focused" or "person centered*" or "person centred" or "person orientated" or "person oriented" or "person tailored" or "person focused").ti,ab,kw.
**#4** decision support system/ or clinical decision rule/ or clinical decision support system/ or technique for order preference by similarity to ideal solution/ or decision making/ or medical decision making/ or patient decision making/ or shared decision making/ or patient participation/ or ("shared decision making" or "Decision Support Technique*" or "Decision Support Model*" or "Patient Participation*" or "decision support" or "decision-making" or "collaborative decision*" or "shared decision*" or "informed decision*" or "informed choice*" or "collaborative decision*" or ((share* or sharing or informed) AND (decision* or deciding or choice*))).ti,ab,kw.

**# 5** Health Status/ or geriatric Assessment/ or patient reported outcome/ or ("Health Status" or "geriatric assessment*" or "patient reported outcom*" or (health adj2 tool*)).ti,ab,kw.

**#6** practice guideline/ or decision making/ or clinical decision making / or evidence based medicine/ or (guideline* or "clinical decision making" or "evidence based medicine").ti,ab,kw.
**#7** #1 AND #2 AND #3 AND #4 AND #5
**#8** #1 AND #2 AND #3 AND #4 AND #6

**#9** #3 OR #4

**#10** #1 AND #2 AND #9 AND #5 AND #6

**#11** #7 OR #8 OR #9

**Web of Science**

**#1** TS=(Neoplasm* OR Tumor* OR Tumour* OR Cancer* OR malignan* OR oncolog* OR carcinom* OR lymphoma*)

**#2** TS=("Interdisciplinary Communication" OR "Patient Care Team*" OR multidisciplinar* OR multi-disciplinar* OR "tumor board*" OR "tumour board*")

#3 TS=("Patient Preference*" OR "Professional-Patient Relation*" OR "Physician-Patient Relation*" OR "patient goal*" OR precision OR individual* or personaliz* OR personalis* OR "patient centered*" OR "patient reported" OR "patient centred" OR "patient orientated" OR "patient oriented" OR "patient tailored" OR "patient Focused" OR "person centered*" OR "person centred" OR "person orientated" OR "person oriented" OR "person tailored" OR "person focused")

**#4** TS=("shared decision making" OR "Decision Support Technique*" OR "Decision Support Model*" OR "Patient Participation*" OR "decision support" OR "decision-making" OR "collaborative decision*" OR "shared decision*" OR "informed decision*" OR "informed choice*" OR "collaborative decision*" OR ((share* OR sharing OR informed) AND (decision* OR deciding OR choice*)))

**#5** TS=("Health Status" OR "geriatric assessment*" OR "patient reported outcom*" OR (health NEAR/2 tool*))

**#6** TS=(guideline* OR "clinical decision making" OR "evidence based medicine")

**#7** #1 AND #2 AND #3 AND #4 AND #5
**#8** #1 AND #2 AND #3 AND #4 AND #6

**#9** #3 OR #4

**#10** #1 AND #2 AND #9 AND #5 AND #6

**#11** #7 OR #8 OR #9

**Supplementary Material Table S1
Data extraction form**

| **Identification variables of Article** |  |
| --- | --- |
| **Article** | First author |
|  | Publication year |
|  | Literature references: year, volume, issue, pages, DOI, country (first author) |
|  | National vs International |
|  | Objective |
|  | Aim/ Research question/s |
| **Study design** | Design + description in text |
| **Setting + Study population** | Number of hospitals involved N: |
|  | Total number of teams participating |
|  | Total number of professionals participating in empirical data collection |
| **Clinical care pathway(s)** | Number of clinical care pathways N: |
| **Tumour boards** | Number of additional professionals in tumour boards N: |
|  | Tumour board 1 (if involved) |
|  | Tumour board 2 (if involved) |
| **Participants** | Number of patients participating N: |
|  | Age (years) |
|  | Gender |
|  | Tumour type |
|  | Disease stage |
| **IODM domains involved** | Domain1 Medical Technical Information yes/no |
|  | Domain2 General Health Status yes/no |
|  | Domain 3 Patients’ Goals & Preferences yes/ no |
| **Detailed aims and strategies/tools of the IODM domains** | Domain1 Medical Technical Information |
|  | Domain2 General Health Status |
|  | Domain 3 Patients’ Goals & Preferences |
| **Detailed strategies/tools of how the domains are integrate** | Domain1 Medical Technical Information |
|  | Domain2 General Health status |
|  | Domain 3 Patients’ Goals & Preferences |
| **Conclusion** |  |
| **Evaluation, (effect-of process evaluation)** | Effect evaluation yes/no/ not clear |
|  | Effect evaluation if yes, on which outcome measure and what is the outcome |
|  | Process evaluation yes/ no / not clear |
|  | Process evaluation if yes, on which intervention, what was the experience, is the intervention implemented |
|  | Results process evaluation |

**Supplementary Material Table S2: Data extraction detailed information studies**

| **First author** | **Total numbers of oncological teams** | **Total number professionals** | **Total number clinical care pathways** | **Tumor care pathways participating** | **Regular tumor boards (1)** | **Tumour boards (2) (when adjusted)** |
| --- | --- | --- | --- | --- | --- | --- |
| **Derman et al.**29 | 1 | Not known | 1 | Hematology | Not mentioned | Hematopoietic Cell transplantation advanced practice practitioner, a Hematopoietic Cell Transplantation professional, a geriatric professional (or oncologist), infectious disease professional, a physical and/or occupational therapist, a dietitian, and a social worker |
| **Henry et al.**30 | 2 | Not known | 2 | Thyroid cancer | Consisted of strictly professional‐based care (ie, surgeons, endocrinologists, and nuclear medicine) | Professional based care + (dietetics, pharmacy, social work, psychology, volunteer community supports) and a dedicated nurse in addition to the regular tumor boards |
| **Festen et al.**19    **Festen et al.**28 | 2    2 | Not known    Not known | Not known  Not known | Colorectal, Upper Gastro Intestinal, hepatobiliary, melanoma, sarcoma, gynecological, skin thyroid, breast urologic, other. Soft tissue, Skin, Colorectal upper Gastro Intestinal, Hepatobiliary, other | Surgeons, Medical oncologists, Radiation oncologist, Radiologist and Pathologists.  Oncologist, Radiologists, surgeon | Nurse, palliative care specialist and a geriatrician in addition to the regular tumor boards  Nurses and a geriatrician attended in addition to the oncology specialists (Oncologist, Radiologists, surgeon) |
| **Huber et al.**27 | 1 | 5 | 1 | Renal malignancies | Senior professionals’ urology, radiology, nephrology and medical oncology specialties, a urology resident | The patient is participating (with loved ones) next to the regular tumor board members |
| **Wright et al.**31 | 1 | Not known | 1 | Breast cancer | Not mentioned | No adjusted tumour board |
| **Massoubre et al.** 32 | 1 | Not known | 1 | Head and Neck cancer | At least one representative of the three primary specialties of ENT surgery, medical oncology and radiation oncology and a nurse. A radiologist, an nuclear doctor and a pathologist would regularly attend meetings | The patients were seen at the end of the presentation of all files. There was a clinical examination at that moment and a presentation of information relative to the therapeutic strategy was adapted |
| **English et al.** 34 | 1 | Not known | 1 | Breast cancer | Not mentioned | Not mentioned |

| **First author** | **Gender participants** | **Tumor type** | **Disease stage Curative/ palliative/ both/ not reported** |
| --- | --- | --- | --- |
| **Derman et al.**29 | f/m | Hematopoietic malignancies. From March 2013: allogeneic Hematopoietic Cell Transplantation. From March broadened eligibility to all autologous Hematopoietic Cell Transplantation. candidates and later cellular therapy candidates | Not reported |
| **Henry et al.**30 | f/m | Confirmed or highly suspicious Thyroid Cancer (TNM classification + Bethesda score of V/VI) | Not reported |
| **Festen et al.**19  **Festen et al.**28 | f/m  f/m | Colorectal malignancies, melanomas, sarcomas, upper gastrointestinal malignancies) and hepatobiliary malignancies, breast, thyroid, urologic, gynecological, upper gastrointestinal, other  Solid malignancy (soft tissue and skin, colorectal, upper Gastro Intestinal, hepatobiliary, other) | Both: I.II, III, IV, no staging   Both: cancer stage I-II, III-IV, Benign |
| **Huber et al.**27 | f/m | Renal cell carcinoma | Both: extent of disease, localized vs system |
| **Wright et al.**31 | f | Clinically staged T1N0 hormone receptor positive breast cancer | Curative |
| **Massoubre et al.** 32 | f/m | Head and Neck cancer | Stage I, II, III and IV |
| **English et al.** 34 | f | Estrogen-receptor positive breast cancer after breast conserving surgery | Stage I |

| **First author** | **Conclusion/ Outcomes** | **Effect evaluation**  yes/no/not clear | **Effect evaluation if yes, on which outcome measure and what is the outcome** | **Process evaluation** yes/no/not clear | **Process evaluation if yes, on which intervention, what was the experience, is the intervention implemented** | **Results process evaluation** |
| --- | --- | --- | --- | --- | --- | --- |
| **Derman et al.**29 | A Geriatric Assessment guided Multi-Disciplinary Clinic for older Hematopoietic Cell Transplantation candidates is feasible and seems to reduce transplant-associated morbidity and mortality. | Yes | The guided re-commendations to enhance resiliency before Hematopoietic Cell Transplantation seems to mitigate early transplant associated morbidity in older patients, significant reductions in patient centric outcomes of skilled nursing facility admissions, hospital length of stay and early death relative to the period before the MDC. | Not clear | This type of multidisciplinary clinic is generalizable to other transplant centers, as the type of specialist providers needed to engage in the Multi-Disciplinary Clinic are typically already available at most institutions with the exception of a geriatrician. | A multidisciplinary clinic should encourage broader and safer utilization of transplantation in older patients. |
| **Henry et al.**30 | Thyroid Carcinoma patients despite their promising medical outcomes indicate that better integrated care and support are in order. | Yes | Improvements following an Interdisciplinary Team-based Care Approach seem clinically meaningful. They showed better outcomes than the control group, namely higher levels of overall well-being and fewer psychical and practical issues and concerns More satisfied overall care, including care coordination + more approachable health care provider. | Yes | Process evaluation was defined as degree of program implementation as designed, including measures of activities and output. They used the following indicators, as suggested in the guidelines for distress management:  Screening and Early Identification of Distress—90% underwent distress‐screening. Teamwork and Collaboration—90% scores ≥ 4 further assessed and referred as needed +90% of cases with score ≥ 4 discussed by the interdisciplinary team and integrated care is developed based on evidence‐based practices. Patient Satisfaction—90% recommend the Interdisciplinary Team-based Care Approach to all. | Considering further supporting data from future studies, the next could be to consider modifying treatment guidelines for this population. |
| **Festen et al.**19    **Festen et al.**28 | For 27%, treatment recommendations from the onco-geriatric MDT differed from the recommendations formulated by the tumor board. These modifications were mostly towards less intensive curative or palliative treatment.  Incorporating geriatric assessment in decision-making did not lead to excess one-year mortality; but did result in fewer complications and days spent in hospital. | Yes  Yes | 27%, treatment recommendations from the onco-geriatric MDT differed from the recommendations formulated by the tumor board  Geriatric assessment did result in fewer complications and days spent in hospital. | Not clear  Not clear | In the onco-geriatric care trajectory, information from the nurse was used, supplemented by information of the Geriatric Assessment and patient preferences, increasing efficiency.  Involving spending extra time for patient assessment in the decision-making process. A nurse-led geriatric assessment is estimated to take up 30 min, and 40 min including MDT attendance. | To investigate whether the onco-geriatric MDT is considered beneficial to patients from their own perspective, a follow-up study to investigate whether the onco-geriatric MDT impacts clinical outcomes and patient satisfaction is underway.  Tailoring treatment decisions to frailty and patient preferences may improve patient outcomes and, as this study shows, does not lead to worse outcomes. |
| **Huber et al.**27 | Patient involvement in multidisciplinary tumor boards is feasible and well regarded by patients and professionals likewise. By stimulating interdisciplinary collaboration, the interdisciplinary counseling service improves patient satisfaction and clinical decision-making.  The interdisciplinary counseling service corrected half of the external treatment plans for better guideline adherence. These positive effects come at the price of higher resource utilization. | Yes | The interdisciplinary counseling service improves patient satisfaction and clinical decision-making. The interdisciplinary counseling service corrected half of the external treatment plans for better guideline adherence. | Not clear | Our structured multi perspective evaluation demonstrates that this new model of care combines better treatment decisions with high patient satisfaction. By participating in interdisciplinary medical discussions, patients might get a better understanding of the reasons for professionals’ advice. Finally, this understanding might provide them with a better basis for their treatment decision. An economic evaluation was essential to estimate cost-effectiveness. Estimated deficit of 39 euros per patient. | The ICS was a successful pilot project, which continued in the presented setting. Further studies should compare decisions in conventional tumor boards with those in the ICS. |
| **Wright et al.**31 | Incorporation of simple geriatric assessments seems to have had a marked impact, with 71% omission of both SLNB and adjuvant RT in patients managed according to an institutional quality improvement initiative. | Yes | With 71% omission of both SLNB and adjuvant RT in patients. | Not clear | Current algorithms do not have a standard approach or questionnaire for eliciting information regarding patient preference for a “more aggressive” versus a “more conservative” approach. Thus, provider bias may enter into the way the information is conveyed and thus the ultimate treatment decision. | We are working to incorporate standardized tools for assessing patient preferences into the algorithms in the future, including questionnaires regarding. |
| **Massoubre et al.** 32 | The presence of the patient during MTMs is not essential if the files are thoroughly presented and discussed | Yes | The MTM plays an essential role in HNC to define the therapeutic management of the patient. Given the high rate of concordance (97%) between the groups studied, it seems that the presence of the patient during the MTM is essential only in very rare cases. | Not clear | Measuring the clinical  characteristics of the patients involved was problematic and  it emerges from our study that assessment of the general state of the patient is one of the main difficulties in therapeutic decision-making for MTM members. We observed that objective performance scales such as Performance Status (PS) and the Karnofsky Scale have limitations in assessing general patient status. | The assessment at the end of the MTM informs patients about their disease and the treatment recommended by the team, its modalities of application, its alternatives and its consequences. The patient remains the ultimate arbiter in the choice of therapeutic treatment, which must be made on the basis of loyal, complete and explicit information. |
| **English et al.** 34 | For adults >65 years with early stage, ER positive breast cancer, s-MDC participation was not significantly associated with lower use of adjuvant RT or HT versus standard consultation but was significantly associated with shorter RT courses, | Yes | There was no significant difference in RT utilization between the s-MDC versus non-s-MDC cohorts (64.5% vs. 76.7%). However, those in the s-MDC cohort were more likely to receive accelerated 5-fraction RT courses versus moderately hypo fractionated regimens delivered in 15–19 fractions (70.0% vs. 39.4%) | Not clear | We initially incorporated the e-Prognosis questionnaire into our clinics but recognized a need to develop a more complete battery of patient reported data to optimize the patient-professional interaction. | We plan to continue and expand our s-MDC format, with the incorporation of routine screening in surgery postoperative clinics to limit  referral pattern biases, and to offer questionnaires to all eligible patients regardless of participation in the formal clinic format. |

**Abbreviations:** f, female: m, male**:** TNM, Tumour Node Metastasis**:** MDT, Multi-Disciplinary Team: MTM, Multi-Disciplinary Team Meetings: MDC, Multi-Disciplinary Clinic: ICS, Interdisciplinary Counseling Service: SLNB, Sentinel Lymph Node Biopsy: non-s-MDC, non-simplified Multi-Disciplinary Clinic: s-MDC, simplified Multi-Disciplinary Clinic: ER, Estrogen Receptor: RT, Radio Therapy: HT, Hormone Therapy

**Supplementary Material File S3: Process evaluation of the mechanisms of impact**

Two of the seven included studies included feasibility and acceptability as process outcomes. The key findings can be summarized as follows:

*Feasibility*

One study, Huber et al.27 evaluated the feasibility from the patients’ perspective and found that patient involvement in multidisciplinary tumour boards is feasible. During an interview, the patients were asked to rate different aspects of the Interdisciplinary Counseling Service and estimated an average of twenty minutes discussion and six questions asked per consultation, which are indicators of high-quality personal interaction. Furthermore, the evaluation by patients revealed that the number of questions asked during the Interdisciplinary Counseling Service was higher when patients made their appointment on their own initiatives. In a focus group with all members of the Interdisciplinary Counseling Service, they mentioned that if in charge to decide, all would implement an Interdisciplinary Counseling Service. A few negative aspects were mentioned, including the high time commitment and challenges around effective coordination of medical experts. 27

*Acceptability*

In the study of Huber et al. 27, the acceptability of the Interdisciplinary Counseling Service was evaluated. The professionals completed a questionnaire in which they indicated that they supported the implementation of an Interdisciplinary Counseling Service. Furthermore, the professionals rated the Interdisciplinary Counseling Service using a non-validated questionnaire overall with “very positive” to “positive”. Patient mentioned in interviews that they considered the presence of professionals with different specialization and perceived them as highly knowledgeable. In addition, patients rated the quality of interpersonal interaction as positive, with only one patient (2%) expressing dissatisfaction. Patients stated they would recommend the consultation service to others. 27 Likewise, Henry et al. 30 assessed the acceptability of the role of the nurse in the Interdisciplinary Team-based Care Approach in interviews with the patient. All patients mentioned that the nurse was essential and recommended it as a key component of care. For example, the nurse was underlined as providing continuity of care, among other mentioned benefits. To add, in the Satisfaction of Care Questionnaire (SCQ) and the Client Satisfaction Questionnaire (CPSQ), 98% of patients recommended using Interdisciplinary Team-based Care Approach with all patients. 30
